# Supplementary material for: A clinical trial of enteral Levetiracetam for acute seizures in pediatric cerebral malaria
Source: Springer Nature journal article supplement (doi:10.1186/s12887-019-1766-2), 2019-11-01
Supplement: MOESM4 [file 17341148]

Supplementary TABLE: Neurologic Sequelae

| Allocation | Sequelae                                                                                                                                                           |
|------------|--------------------------------------------------------------------------------------------------------------------------------------------------------------------|
| LVT        | LVT008: Cortically blind, deaf and severely hypotonic<br><br>LVT009: Hemiparesis and ataxia with titubation<br><br>LVT050: Deaf, blind and with abnormal movements |
| PB         | LVT037: Ataxia and hemiparesis<br><br>LVT047: Hypotonic and blind                                                                                                  |
