# Supplementary material for: A clinical trial of enteral Levetiracetam for acute seizures in pediatric cerebral malaria
Source: Springer Nature journal article supplement (doi:10.1186/s12887-019-1766-2), 2019-11-01
Supplement: MOESM5 [file 17341148]

Supplementary TABLE: Serious Adverse Events (SAE) by Allocation\*

|                                               | <b>Enteral<br/>Levetiracetam (n=23)</b> | <b>Usual Care (n=21)<br/>Phenobarbital<br/>Intent-to-Treat</b> | <b>Phenobarbital<br/>received per<br/>protocol<br/>(n=15)</b> |
|-----------------------------------------------|-----------------------------------------|----------------------------------------------------------------|---------------------------------------------------------------|
| Any SAE                                       | 5 (22%)                                 | 8 (38%)                                                        | 8 (53%)                                                       |
| Thrombocytopenia <sup>^</sup>                 | 2 (9%)                                  | 1 (5%)                                                         | 1 (7%)                                                        |
| Elevated AST                                  | 3 (13%)                                 | 2 (10%)                                                        | 2 (13%)                                                       |
| Acute kidney injury                           | 1 (4%)                                  | 0                                                              | 0                                                             |
| <b>Respiratory<br/>suppression/aspiration</b> | <b>0</b>                                | <b>4 (19%)</b>                                                 | <b>4 (27%)</b>                                                |
| Death                                         | 1 (4%)                                  | 5 (24%)                                                        | 5 (33%)                                                       |

\* All comparisons p>0.05. SADR's are noted in **bold**

<sup>^</sup> 50% decrease from baseline at 24 hours post randomization or <25,000 per µL at 7 days post randomization
