# Supplementary material for: A clinical trial of enteral Levetiracetam for acute seizures in pediatric cerebral malaria
Source: Springer Nature journal article supplement (doi:10.1186/s12887-019-1766-2), 2019-11-01
Supplement: MOESM6 [file 17341148]

Supplementary TABLE: Adverse Events, not Serious

|                                | <b>Enteral Levetiracetam<br/>(n=23)</b> | <b>Usual Care (n=21)<br/>(+/- Phenobarbital)</b> |
|--------------------------------|-----------------------------------------|--------------------------------------------------|
| Any adverse event, not serious | 15 (65%)                                | 18 (86%)                                         |
| Anemia <sup>^</sup>            | 0                                       | 1 (5%)                                           |
| Thrombocytopenia <sup>*</sup>  | 2 (9%)                                  | 1 (5%)                                           |
| Thrombocytosis                 | 2 (9%)                                  | 1 (5%)                                           |
| Decreased reticulocyte count   | 1 (4%)                                  | 4 (19%)                                          |
| Abnormal ECG                   | 0                                       | 1 (5%)                                           |
| Vomiting                       | 1 (4%)                                  | 0                                                |
| Increased AST                  | 5 (22%)                                 | 7 (33%)                                          |
| Increased ALT                  | 4 (17%)                                 | 4 (19%)                                          |
| Increased alkaline phosphatase | 3 (13%)                                 | 5 (24%)                                          |
| Increased potassium            | 7 (31%)                                 | 4 (19%)                                          |
| Increased chloride             | 2 (9%)                                  | 0                                                |
| Increased phosphate            | 6 (26%)                                 | 1 (5%)                                           |
| Increased calcium              | 1 (4%)                                  | 0                                                |
| <b>Myoclonus (transient)</b>   | <b>1 (4%)</b>                           | <b>0</b>                                         |
| <b>Persistent somnolence</b>   | <b>0</b>                                | <b>1 (5%)</b>                                    |

<sup>^</sup> Hemoglobin at 7 days post randomization decreased compared to hemoglobin at 24 hours post randomization without associated increase in reticulocytes

<sup>\*</sup> 50% decrease from baseline at 24 hours post randomization or <25,000 per  $\mu$ L at 7 days post randomization

SADRs are noted in **bold**
